# Supplementary material for: Differences and Changes in Cerebellar Functional Connectivity of Parkinson’s Patients with Visual Hallucinations
Source: MDPI journal article supplement (doi:10.3390/brainsci13101458), 2023-10-13
Supplement: s1 [file s1]

## Supplementary Materials

**Table S1.** FC statistical analysis results for  $p < 0.05$ .

| PD-H vs. HC     |                                | PD-H vs. PD-NH |                    |
|-----------------|--------------------------------|----------------|--------------------|
| Node-a          | Node-b                         | Node-a         | Node-b             |
| Cerebelum_3_R   | Frontal_Mid_R                  |                |                    |
| Cerebelum_4_5_L | Precuneus_L                    |                |                    |
| Cerebelum_4_5_R | Occipital_Inf_R<br>Precuneus_L |                |                    |
| Cerebelum_6_R   | Postcentral_L<br>Precuneus_L   |                | Precentral_L       |
| Cerebelum_9_L   | Occipital_Inf_R                |                | Frontal_Mid_L      |
|                 | Frontal_Sup_R                  |                | Frontal_Inf_Oper_L |
|                 | Frontal_Mid_R                  |                | Frontal_Inf_Oper_R |
|                 | Occipital_Inf_R                |                | Frontal_Inf_Tri_L  |
| Cerebelum_9_R   | Postcentral_L                  | Vermis_1_2     | Frontal_Inf_Tri_R  |
|                 | Parietal_Inf_L                 |                | Cingulum_Mid_R     |
|                 | Precuneus_L                    |                | Postcentral_L      |
|                 | Temporal_Sup_L                 |                | Parietal_Inf_L     |
| Vermis_3        | Frontal_Mid_R                  |                | Precuneus_L        |
| Vermis_1_2      | Occipital_Inf_R                |                | Precuneus_R        |
|                 | Occipital_Inf_R                |                |                    |
|                 | Postcentral_L                  |                |                    |
| Vermis_4_5      | Parietal_Inf_L                 |                |                    |
|                 | Precuneus_L                    |                |                    |
| Vermis_8        | Occipital_Inf_R                |                |                    |
| PD-NH vs HC     |                                |                |                    |
| Cerebelum_9_R   | Temporal_Sup_L                 |                |                    |
|                 | Precentral_L                   |                |                    |
|                 | Frontal_Inf_Oper_L             |                |                    |
|                 | Frontal_Inf_Oper_R             |                |                    |
|                 | Frontal_Inf_Tri_L              |                |                    |
| Vermis_1_2      | ParaHippocampal_L              |                |                    |
|                 | Angular_R                      |                |                    |
|                 | Cerebelum_4_5_L                |                |                    |
|                 | Cerebelum_4_5_R                |                |                    |
